# Supplementary material for: Comparative analysis morphology, anatomical structure and transcriptional regulatory network of chlorophyll biosynthesis in Oryza longistaminata, O. sativa and their F1 generation
Source: PeerJ. 2021 Sep 6;9:e12099. doi: 10.7717/peerj.12099 (PMC8428261; doi:10.7717/peerj.12099)
Supplement: Supplemental Information 1 [file peerj-09-12099-s001.xlsx]

## Sheet: sheet 1
	1		2		3
	665nm	649nm	665nm	649nm	665nm	649nm	M（g）	Ca（mg/L）	Cb（mg/L）		Ca（mg/L）	Cb（mg/L）		Ca（mg/L）	Cb（mg/L）
YP1020	3.4092	1.5237	3.4214	1.5028	3.4522	1.5032	0.1164	37.0753	13.0762		37.3893	12.4652		37.8162	12.2498
	4.1517	1.818	4.2176	1.7952	4.2012	1.8007	0.1117	45.4084	14.9868		46.4845	13.9354		46.2179	14.1927
	3.2841	1.4646	3.2451	1.4532	3.2655	1.4531	0.1279	35.7367	12.5168		35.2711	12.5177		35.5564	12.3659
A629	2.6506	1.165	2.5989	1.1644	2.6248	1.1678	0.088	28.9607	9.67601		28.2436	10.0395		28.5815	9.93475
	3.6024	1.6145	3.6054	1.6421	3.6102	1.6245	0.1083	39.1457	13.9284		38.9977	14.5953		39.1857	14.1209
	3.2378	1.4264	3.2218	1.4011	3.2295	1.4321	0.1215	35.3537	11.9022		35.3045	11.3879		35.1987	12.1053
HA629-1	3.4974	1.5525	3.5428	1.5878	3.5014	1.5478	0.0986	38.1075	13.1494		38.498	13.6982		38.1957	13.0028
	4.2411	1.9999	4.3212	2.0255	4.3007	1.9789	0.1034	45.404	18.8727		46.3453	18.9253		46.3799	17.9122
	4.0218	1.9033	4.1147	1.9224	4.0847	1.9078	0.1058	43.0094	18.0668		44.174	17.8635		43.8559	17.7187
	Ca（mg/L）	Ca（mg/L）	Ca（mg/L）	average		Ca（mg/g）	Ca（mg/g）	Ca（mg/g）	average
YP1020	37.0753	38.7843	37.8162	37.8919		3.18516	3.21214	3.24881	3.21537
	45.4084	46.4845	46.2179	46.0369		4.06521	4.16155	4.13768	4.12148
	35.7367	35.2711	35.5564	35.5214		2.79412	2.75771	2.78002	2.77728
A629	28.9607	28.2436	28.5815	28.5952		3.29099	3.2095	3.2479	3.24946
	39.1457	38.9977	39.1857	39.1097		3.61456	3.60089	3.61826	3.61124
	35.3537	35.3045	35.1987	35.2856		2.90977	2.90572	2.89701	2.90417
HA629-1	38.1075	38.498	38.1957	38.2671		3.86486	3.90446	3.8738	3.88104
	45.404	46.3453	46.3799	46.0431		4.39111	4.48214	4.48549	4.45291
	43.0094	44.174	43.8559	43.6798		4.06516	4.17523	4.14517	4.12852
	Cb（mg/L）	Cb（mg/L）	Cb（mg/L）			Cb（mg/g）	Cb（mg/g）	Cb（mg/g）
YP1020	13.0762	11.7332	12.2498	12.3531		1.12339	1.0709	1.05239	1.08222
	14.9868	13.9354	14.1927	14.3716		1.3417	1.24757	1.27061	1.28663
	12.5168	12.5177	12.3659	12.4668		0.97864	0.978713	0.966843	0.974732
A629	9.67601	10.0395	9.93475	9.88341		1.09955	1.14085	1.12895	1.12312
	13.9284	14.5953	14.1209	14.2148		1.28609	1.34767	1.30386	1.31254
	11.9022	11.3879	12.1053	11.7985		0.979609	0.937274	0.996319	0.971067
HA629-1	13.1494	13.6982	13.0028	13.2835		1.33361	1.38927	1.31875	1.34721
	18.8727	18.9253	17.9122	18.5701		1.82521	1.8303	1.73232	1.79594
	18.0668	17.8635	17.7187	17.883		1.70764	1.68842	1.67473	1.69026
	a	b	a+b		a	b	a+b		a	b	a+b
YP1020	3.18516	1.12339	4.30855		3.21214	1.0709	4.28303		3.24881	1.05239	4.3012
	4.06521	1.3417	5.40691		4.16155	1.24757	5.40912		4.13768	1.27061	5.40829
	2.79412	0.97864	3.77276		2.75771	0.978713	3.73642		2.78002	0.966843	3.74686
A629	3.29099	1.09955	4.39053		3.2095	1.14085	4.35035		3.2479	1.12895	4.37685
	3.61456	1.28609	4.90065		3.60089	1.34767	4.94857		3.61826	1.30386	4.92212
	2.90977	0.979609	3.88938		2.90572	0.937274	3.843		2.89701	0.996319	3.89333
HA629-1	3.86486	1.33361	5.19847		3.90446	1.38927	5.29373		3.8738	1.31875	5.19255
	4.39111	1.82521	6.21631		4.48214	1.8303	6.31244		4.48549	1.73232	6.21781
	4.06516	1.70764	5.7728		4.17523	1.68842	5.86365		4.14517	1.67473	5.8199
