# Supplementary material for: Comparative analysis morphology, anatomical structure and transcriptional regulatory network of chlorophyll biosynthesis in Oryza longistaminata, O. sativa and their F1 generation
Source: PeerJ. 2021 Sep 6;9:e12099. doi: 10.7717/peerj.12099 (PMC8428261; doi:10.7717/peerj.12099)
Supplement: Supplemental Information 2 [file peerj-09-12099-s002.xlsx]

## Sheet: sheet1
		Pn	Gs	Ci	Tr			Pn	Gs	Ci	Tr	sd
YP1020	Upper	12.4695	0.256689	320.058	3.45845		YP1020	12.9476	0.276904	321.161	3.78219	0.687736	0.0472223	5.8362	0.573134
		12.6375	0.243154	315.955	3.44418			19.7404	0.534771	325.08	5.73709	0.81566	0.107816	7.60837	0.86995
		13.7358	0.330868	327.47	4.44393			15.3867	0.364273	333.135	4.44773	1.56788	0.0325908	7.30522	0.155343
		12.9476	0.276904	321.161	3.78219		A629	10.2412	0.252216	332.267	4.01302	1.81979	0.0370903	8.88475	0.53685
	Middle	20.131	0.501097	321.529	5.33754			19.73	0.515629	320.407	6.42354	2.62766	0.0645808	4.70737	0.233641
		18.803	0.447811	319.896	5.13869			20.7824	0.571254	322.14	6.86914	2.75012	0.0955232	3.60886	0.380942
		20.2874	0.655405	333.815	6.73504		HA629-1	18.395	0.482777	322.165	6.43949	0.716002	0.0295582	3.54529	0.342769
		19.7404	0.534771	325.08	5.73709			23.2707	0.638986	316.577	7.47375	2.1429	0.0189798	8.53655	0.133106
	Lower	15.3511	0.389719	330.811	4.62704			19.3196	0.636212	324.503	6.9524	2.31002	0.0253533	10.2344	0.990074
		13.8369	0.327539	327.273	4.35384
		16.9721	0.37556	341.319	4.36231
		15.3867	0.364273	333.135	4.44773
A629	Upper	11.5761	0.25214	322.095	3.8735
		8.16837	0.215163	338.51	3.55971
		10.9792	0.289344	336.196	4.60586
		10.2412	0.252216	332.267	4.01302
	Middle	22.7629	0.589883	315.125	6.67614
		18.1386	0.484447	321.936	6.21519
		18.2885	0.472556	324.159	6.37929
		19.73	0.515629	320.407	6.42354
	Lower	23.889	0.679794	318.479	7.30627
		19.7989	0.533979	322.247	6.6931
		18.6593	0.499987	325.695	6.60806
		20.7824	0.571254	322.14	6.86914
HA629-1	Upper	17.622	0.466778	325.973	6.32629
		18.5274	0.464667	318.959	6.16764
		19.0355	0.516886	321.563	6.82454
		18.395	0.482777	322.165	6.43949
	Middle	21.5714	0.634995	325.519	7.43936
		25.678	0.659644	308.514	7.62067
		22.5628	0.622319	315.699	7.36121
		23.2707	0.638986	316.577	7.47375
	Lower	17.4298	0.621215	319.057	5.82849
		18.6342	0.665485	336.309	7.69563
		21.8947	0.621937	318.144	7.33309
		19.3196	0.636212	324.503	6.9524
