# Supplementary material for: Comparative analysis morphology, anatomical structure and transcriptional regulatory network of chlorophyll biosynthesis in Oryza longistaminata, O. sativa and their F1 generation
Source: PeerJ. 2021 Sep 6;9:e12099. doi: 10.7717/peerj.12099 (PMC8428261; doi:10.7717/peerj.12099)
Supplement: Supplemental Information 3 [file peerj-09-12099-s003.xlsx]

## Sheet: sheet 1
	A1	A2	A3	B1	B2	B3	C1	C2	C3
GLuRS	0.177815	0.189993	0.110929	0.336931	4.49661	0.442496	0.580615	0.634537	0.0087618
ALAD	0.415351	0.413058	0.212785	0.400831	1.26163	0.439119	0.684758	0.725581	0.0156699
PBGD	0.253633	0.307859	0.470471	1.00354	11.3336	1.14091	0.882143	0.679965	0.0078973
UROD	0.360752	0.521838	0.623484	1.29198	13.7783	0.92973	0.0849968	0.939306	0.0150916
CPOX	0.334789	0.372796	0.340187	0.301276	3.73888	0.407859	0.733677	0.637034	0.0131405
POR/CRD1	6.30943	8.88708	4.02566	8.68973	16.8708	5.50782	2.27813	11.1749	7.40741
DVR	0.103926	0.0456143	0.11108	0.246274	2.00638	0.153876	0.80971	0.710037	0.00762536
HCAR	0.367015	0.482911	0.566166	1.43233	11.4229	0.956007	0.0736139	0.97522	0.0192529
CHLG/YGL1	0.304652	0.506611	0.590828	1.11867	8.4224	0.88845	0.947734	0.672541	0.00512877
MgCH	10.0981	8.21377	5.67322	11.2541	22.5614	7.68272	9.78271	9.93756	4.30943
NYC1	0.192847	0.311676	0.332913	0.972764	9.10541	1.20255	0.951245	0.953934	0.0425764
HEMA1	15.0346	12.4148	10.9692	29.1537	35.1533	27.715	2.21855	14.0308	7.67014
ACD1	0.217282	0.202204	0.464141	0.943352	10.0289	0.895484	0.92305	0.645864	0.00835165
	B1	B2	B3
GLuRS	0.336931	4.49661	0.442496
ALAD	0.400831	1.26163	0.439119
PBGD	1.00354	11.3336	1.14091
UROD	1.29198	13.7783	0.92973
CPOX	0.301276	3.73888	0.407859
POR	8.68973	16.8708	5.50782
DVR	0.246274	2.00638	0.153876
HCAR	1.43233	11.4229	0.956007
CHLG	1.11867	8.4224	0.88845
MgCH	11.2541	22.5614	7.68272
NYC1	0.972764	9.10541	1.20255
HEMA1	29.1537	35.1533	27.715
ACD1	0.943352	10.0289	0.895484
	C1	C2	C3
GLuRS	0.580615	0.634537	0.0087618
ALAD	0.684758	0.725581	0.0156699
PBGD	0.882143	0.679965	0.0078973
UROD	0.0849968	0.939306	0.0150916
CPOX	0.733677	0.637034	0.0131405
POR	2.27813	11.1749	7.40741
DVR	0.80971	0.710037	0.00762536
HCAR	0.0736139	0.97522	0.0192529
CHLG	0.947734	0.672541	0.00512877
MgCH	9.78271	9.93756	4.30943
NYC1	0.951245	0.953934	0.0425764
HEMA1	2.21855	14.0308	7.67014
ACD1	0.92305	0.645864	0.00835165
